1 **Characterization of the adaptation to visuomotor rotations in the**  
2 **muscle synergies space**

3 *Running title: Synergies rotations during visuomotor adaptations*

4 Giacomo Severini<sup>1,2,3\*</sup>, Magdalena Zych<sup>1</sup>

5

6 <sup>1</sup> School of Electrical and Electronic Engineering, University College Dublin, Dublin, Ireland

7 <sup>2</sup> Centre for Biomedical Engineering, University College Dublin, Dublin, Ireland

8 <sup>3</sup> Insight Center for Data Analytics, University College Dublin, Dublin, Ireland

9

10 \* *Corresponding author*

11 **Email: [giacomo.severini@ucd.ie](mailto:giacomo.severini@ucd.ie)**

12

13

14

15

16

17

18

19

20

## 21 **Abstract**

22 The adaptation to visuomotor rotations is one of the most studied paradigms of motor learning. Previous  
23 literature has presented evidence of a dependency between the process of adaptation to visuomotor  
24 rotations and the constraints dictated by the workspace of the biological actuators, the muscles, and their  
25 co-activation strategies, modeled using muscle synergies analysis. To better understand this  
26 relationship, we asked a sample of healthy individuals (N =7) to perform two experiments aiming at  
27 characterizing the adaptation to visuomotor rotations in terms of rotations of the activation space of the  
28 muscle synergies during isometric reaching tasks. In both experiments, subjects were asked to adapt to  
29 visual rotations altering the position mapping between the force exerted on a fixed manipulandum and  
30 the movement of a cursor on a screen. In the first experiment subjects adapted to three different  
31 visuomotor rotation angles (30°, 40° and 50° clockwise) applied to the whole experimental workspace.  
32 In the second experiment subjects adapted to a single visuomotor rotation angle (45° clockwise) applied  
33 to eight different sub-spaces of the whole workspace, while also performing movements in the rest of  
34 the unperturbed workspace. The results from the first experiment confirmed the observation that  
35 visuomotor rotations induce rotations in the synergies activation workspace that are proportional to the  
36 visuomotor rotation angle. The results from the second experiment showed that rotations affecting  
37 limited sub-spaces of the whole workspace are adapted for by rotating only the synergies involved in  
38 the movement, with an angle proportional to the distance between the preferred angle of the synergy  
39 and the sub-space covered by the rotation. Moreover, we show that the activation of a synergy is only  
40 rotated when the sub-space covered by the visual perturbation is applied at the boundaries of workspace  
41 of the synergy. We found these results to be consistent across subjects, synergies and sub-spaces.  
42 Moreover, we found a correlation between synergies and muscle rotations further confirming that the  
43 adaptation process can be well described, at the neuromuscular level, using the muscle synergies model.  
44 These results provide information on how visuomotor rotations can be used to induce a desired  
45 neuromuscular response.

46 **Keywords: visuomotor rotations, motor adaptation, motor learning, muscle synergies, isometric**  
47 **reaching**

## 48 **Introduction**

49 Adaptation to visuomotor rotations is one of the most widely studied paradigms of motor learning  
50 (Krakauer et al., 2000; Krakauer et al., 2019), and has been extensively discussed in the past three  
51 decades. Correlates of the processes contributing to visuomotor adaptations have been observed,  
52 directly or indirectly, in the primary motor cortex (Wise et al., 1998), the supplementary motor cortex  
53 (Mandelblat-Cerf et al., 2009), the premotor cortex (Perich et al., 2018) and the cerebellum (Della-  
54 Maggiore et al., 2009; Schlerf et al., 2012; Block and Celnik, 2013), in both humans and animal models.

55 Despite these neurophysiological insights, most of what we know regarding the functional processes  
56 contributing to visuomotor adaptation has been obtained through behavioral experiments (Krakauer et  
57 al., 1999; Krakauer et al., 2000; Bock et al., 2001; Krakauer et al., 2006; Hinder et al., 2007; Brayanov  
58 et al., 2012; De Marchis et al., 2018). These experiments have allowed to characterize adaptations, and,  
59 consequently, the control of voluntary movements, from several different points of view. Some studies  
60 have characterized how adaptations generalize (Shadmehr, 2004), either by transferring to similar  
61 untrained scenarios (Krakauer et al., 2006), or even to another limb (Sainburg and Wang, 2002) or by  
62 interfering with incompatible adaptations (Bock et al., 2001; Woolley et al., 2007). Other studies have  
63 been able to discern between the implicit and explicit components of the learning associated with the  
64 adaptation process (Taylor et al., 2014; Bond and Taylor, 2015). Moreover, the visuomotor adaptation  
65 paradigm has often been used to investigate which frame of reference, implicit (joint-based) or explicit  
66 (world-based) is employed when planning, executing and adapting movements (Krakauer et al., 2000;  
67 Brayanov et al., 2012; Carroll et al., 2014; Rotella et al., 2015). Most of these studies have investigated  
68 adaptations in terms of task performance or through their unraveling in the intrinsic space of joint  
69 coordinates or in the extrinsic space specific to the experimental set-up that was employed in the study.

70 A few studies have also investigated how motor adaptations are achieved in the space of the body  
71 actuators, the muscles. In these studies, visuomotor and force-field adaptations have been linked to the  
72 “tuning” of muscular activity (Thoroughman and Shadmehr, 1999; Gentner et al., 2013), consisting in  
73 perturbation-dependent rotations of the activation workspace of the muscles involved in the movement.

74 Following the observation that complex movements can be described, at the neuromuscular level, by

75 the combination of a limited number of muscular co-activation modules, generally referred-to as muscle  
76 synergies (d'Avella et al., 2003; d'Avella et al., 2006; Delis et al., 2014), a number of studies have also  
77 attempted to characterize motor adaptations in relationship to the muscle synergies structure (de Ruyg  
78 et al., 2009; Berger et al., 2013; Gentner et al., 2013; De Marchis et al., 2018). Such studies presented  
79 mounting evidence that the underlying structure of neuromechanical control directly constraints the  
80 adaptation process (de Ruyg et al., 2009), correlates with phenomena such as generalization (De  
81 Marchis et al., 2018) and even appears to dictate what kind of perturbations can be adapted for (Berger  
82 et al., 2013). Nevertheless, a full characterization of the link between motor adaptations and the tuning  
83 of the muscle synergies is still lacking.

84 Therefore, the aim of this study is to further understand how the muscular co-activation strategies that  
85 have been observed consistently during voluntary movements in the upper limb constraint visuomotor  
86 adaptations and if there are identifiable and exploitable relationships between the spatial characteristics  
87 of a perturbing visuomotor rotation and the muscular activity during isometric reaching tasks.

88 To achieve these aims, we first investigated how different visuomotor rotation angles applied to the  
89 whole workspace during isometric reaching movements affect the rotation of all the synergies  
90 characterizing the neuromuscular control. The aim of this experiment was to confirm previous  
91 observations, derived in studies employing only one perturbation angle, that synergies and muscles  
92 tuning is proportional to the angle of the perturbing rotation (Gentner et al., 2013; De Marchis et al.,  
93 2018). In a second experiment we investigated how a rotation affecting a small sub-space of the whole  
94 movement workspace leads to differential rotations of the synergies involved.

95 Here we found a selective tuning of the muscle synergies that is constrained, as expected, only to the  
96 synergies directly acting in the perturbed sub-space and that is proportional to the distance between the  
97 perturbed workspace and the workspace covered by each synergy. This proportionality allowed us to  
98 derive some generalizable observations on how synergies and muscles are tuned in response to specific  
99 visuomotor rotations. The results of this study can provide useful information on how visuomotor  
100 rotations can be used to design a desired neuromuscular output, by exploiting fixed relationships  
101 between the representation of movement in the neuromuscular space and the visual perturbations.

102 **Methods:**

103 **Experimental setup and Protocol**

104 Seven healthy individuals (2 females, age  $26.7 \pm 2.6$ ) participated in this study. Each individual  
105 participated in two experimental sessions, performed in different days within the same week, each  
106 consisting of a series of isometric reaching tasks performed with their right arm. All the experimental  
107 procedures describe in the following have been approved by the Ethical Committee of University  
108 College Dublin and have been conducted according to the WMA's declaration of Helsinki. All subjects  
109 gave written informed consent before participating to this study. Each experimental session was  
110 performed using the setup previously used in (De Marchis et al., 2018). During all experimental  
111 procedures, the subjects sat in a chair with their back straight. Their right forearm was put on a support  
112 plan. The hand was strapped to a fixed manipulandum (consisting of a metal cylinder of 4 cm of  
113 diameter) attached to a tri-axial load cell (3A120, Interface, UK), while the wrist and forearm were  
114 wrapped to the support plan and immobilized using self-adhesive tape. Data from the load cell were  
115 sampled at 50 Hz. During all exercises, subjects kept their elbow flexed at  $90^\circ$  and their shoulder  
116 horizontally abducted at  $45^\circ$  (**Figure 1A**), so that the manipulandum would be exactly in front of the  
117 center of rotation of their shoulder. The elevation of the chair was controlled so to keep the shoulder  
118 abducted at  $100^\circ$ . Subjects sat in front of a screen displaying a virtual scene at a distance of 1 m. The  
119 virtual scene consisted of a cursor, whose position was commanded in real-time by the  $x$  and  $y$   
120 components of the force exerted on the load cell through the manipulandum, a filled circle indicating  
121 the center of the exercise space and, depending on the phase of the exercise, a target, represented by a  
122 hollow circle. Both the center and target circles had a radius of 1.3 cm. Across all the blocks of the  
123 experiment subjects experienced a total of 16 different targets, positioned in a compass-like  
124 configuration at angular distances of  $22.5^\circ$  (**Figure 1A**) at a distance of 9.5 centimeters from the center  
125 of the screen, equivalent to 15 N of force exerted on the manipulandum (with the center of the virtual  
126 scene corresponding to 0 N). The virtual scene and the exercise protocol were controlled using a custom  
127 Labview software. In both experiments, the subjects were asked to perform both unperturbed and  
128 perturbed movements, where the perturbation consisted of a clockwise visuomotor rotation affecting

129 the mapping between the force exerted on the manipulandum and the position of the cursor shown on

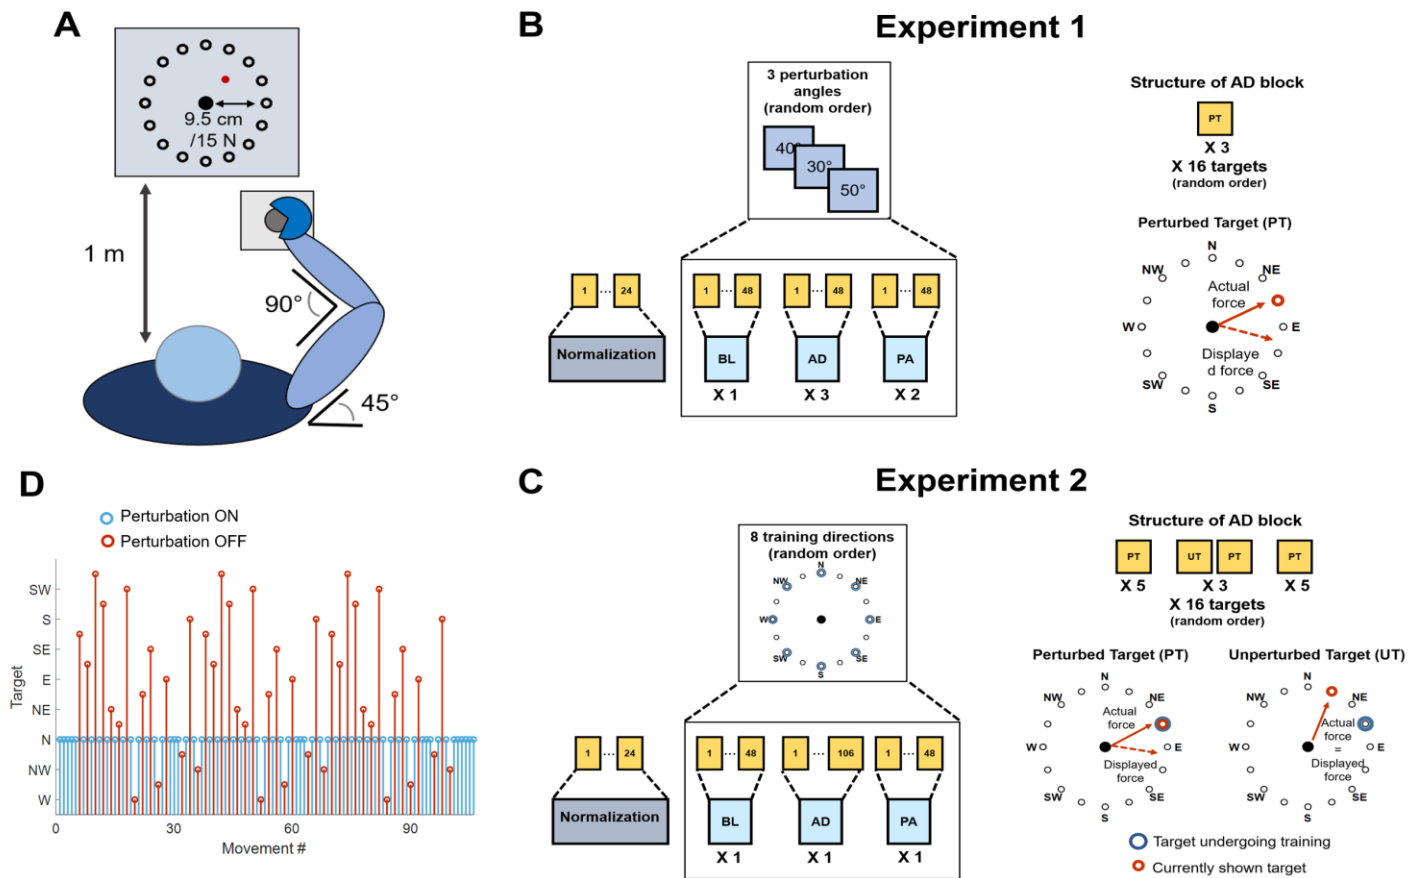

**Figure 1. Experimental setup and procedures.** (A) Graphical representation of the task that was employed in both experiments. Subjects kept their position consistent across all trials. The forearm was strapped to a support surface (not shown in the picture) and the hand was strapped to the manipulandum to avoid the use of the hand muscles during the task. Subjects were presented a virtual scene on a screen in front of them (1 m distance). The virtual scene consisted of a cursor, controlled in position by the force exerted on the manipulandum, and 16 targets, spaced 22.5° apart. (B) Protocol for Experiment 1. Subjects experienced a total of 19 blocks consisting of a normalization block (28 movements) and 3 macro-blocks of 6 block each, divided in baseline (BL, 1 block, unperturbed), adaptation (AD, 3 blocks, perturbed) and post-adaptation (PA, 2 blocks, unperturbed). Each block consisted of 48 movements. Each macro-block was characterized by a different clockwise (CW) rotation angle applied during the AD blocks (30°, 40° or 50°). In the AD blocks subjects experienced 3 repetitions of each target in a random order. The rotation was applied to all targets. (C) Protocol for Experiment 2. Subjects experienced a total of 25 blocks consisting of a normalization block (28 movements) and 8 macro-blocks of 3 block each, divided in baseline (BL, 1 block, unperturbed), adaptation (AD, 1 block, perturbed) and post-adaptation (PA, 1 block, unperturbed). The BL and PA block consisted of 48 movement. The AD block consisted of 106 movements. During the AD block the perturbation was applied to one target only (perturbed target, PT), while the mapping between force and cursor position was unperturbed for the other targets (unperturbed targets, UT). Each macro-block was characterized by a different perturbed target (among 8 different random targets, spaced 45° apart). Subjects first experienced the PT 5 times, then alternated between the PT and all the UTs in a random order for 3 times (for a total of 96 movements) and then concluded the block with 5 consecutive repetitions of the PT. (D) Graphical representation of the target order experienced during the AD phase of Experiment 2. In blue is presented the perturbed target (in this case N), in red the unperturbed ones.

130 the virtual scene. The angle of the visuomotor rotation varied across the different experiments (see  
131 below). At the beginning of each experimental session subjects underwent a practice trial with the setup.  
132 In this trial (at all identical to the unperturbed baseline and post-adaptation trials present in both  
133 Experiment 1 and 2), subjects were asked to reach to the 16 targets in a randomized order three times,  
134 for a total of 48 movements. Subjects were instructed to reach the targets at a comfortable speed in a  
135 time not exceeding 1.5 s and were given negative feedback (consisting in the target turning red) if they  
136 took more than the expected time to reach for each target. In all the trials the movement time was not  
137 restricted, and subjects were presented a new target only when the current target had been reached.  
138 Thus, subjects were forced to explore the space until they were able to reach the current target before  
139 being shown the following one. Subjects were asked to bring the cursor back to the center of the screen  
140 as soon as they reached a target. These instructions were used for all perturbed and unperturbed reaching  
141 trials performed during both experiments, with the exclusion of the normalization blocks (see below).

142 **Experiment 1** consisted of 19 blocks (**Figure 1B**). The first block consisted of a normalization block  
143 that was used to determine the average EMG activity relative to 8 reaching directions covering the  
144 whole workspace at angular intervals of  $45^\circ$ . During the normalization block subjects were asked to  
145 reach for each one of the eight targets (presented in a random order) and hold the cursor on the target  
146 for 5 seconds. Subjects repeated the reach-and-hold task three times for each target. The following 18  
147 blocks were divided in 3 macro-blocks each constituted by 6 blocks. In each macro-block, subjects  
148 experienced 1 baseline block (BL), where they were asked to reach for all the 16 targets three times (48  
149 total movements) without the visual perturbation. Subjects then experienced 3 adaptation blocks (AD1,  
150 AD2 and AD3) where they reached for all the 16 targets three times (48 total movements) while the  
151 visual perturbation was applied to the whole workspace. Finally, subjects experienced 2 post-adaptation  
152 blocks (PA1 and PA2), where they were asked to reach for all the 16 targets three times (48 total  
153 movements) without the visual perturbation. Each macro-block was characterized by a different visual  
154 perturbation angle during the AD blocks, equal to  $30^\circ$ ,  $40^\circ$  or  $50^\circ$ , in a random order. All 3 AD blocks  
155 of a macro-block were characterized by the same visual perturbation angle.



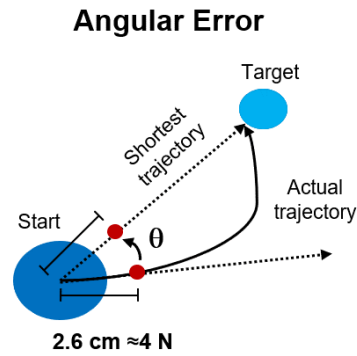

**Figure 2. Performance metrics for reaching in both experiments.** The angular error was calculated, for each movement repetition, as the angle between the optimal, shortest, straight trajectory and the actual trajectory at 2.6 cm from the center of the workspace.

156

157 **Experiment 2** consisted of 25 blocks (**Figure 1C**). The first block of Experiment 2 consisted of a

158 normalization block, identical to the one experienced in Experiment 1. The following 24 blocks were

159 divided in 8 macro-blocks each constituted by 3 blocks. During each macro-block subjects experienced

160 a baseline block BL identical to the one experienced during Experiment 1 (48 unperturbed movements,

161 3 per target in a random order). Then subjects experience an adaptation block AD where a 45° visual

162 perturbation was applied only to one target, while the virtual scene was unperturbed for the other 15

163 targets. The AD block of Experiment 2 consisted of 106 total reaching movements (**Figure 1D**).

164 Subjects were first asked to reach for the perturbed target 5 times, then they were asked to reach for all

165 the 16 targets (including the perturbed one) three times, each repetition interspersed by a single

166 repetition of the perturbed target. Thus, each reaching movement to one of the 16 targets, presented in

167 a random order, was followed by a movement to the perturbed target. Subjects in this phase alternated

168 perturbed and unperturbed movements except for when the perturbed target was interspersed with itself,

169 where they experienced 3 consecutive perturbed targets. Subjects concluded the block by experiencing

170 the perturbed target 5 consecutive times. In total, during the AD block, subjects performed 45

171 unperturbed and 61 perturbed movements (**Figure 1D**). The design of this block allowed for evaluating

172 how adapting for a perturbation acting on one single target affected also the reaching to the unperturbed

173 targets. At the same time, this experimental design counteracted the forgetting effect that reaching for

174 unperturbed targets has on the adaptation process. After the AD block, subjects experienced a single

175 PA block, identical to the ones experienced during Experiment 1. Each of the 8 macro-blocks was



176 characterized by a different perturbed target during the AD block. The perturbation was applied to 8  
177 targets covering the whole workspace at angular intervals of 45° (**Figure 1C**). The order of the perturbed  
178 target, and thus of the macro-blocks, was randomized.

### 179 **Analysis of reaching movements**

180 Data from the load cell were filtered using a low-pass filter (Butterworth, 3<sup>rd</sup> order) with cut-off  
181 frequency set at 10Hz. Changes in the force trajectories during the different phases of both the  
182 experiments were characterized using the angular error (AE) metric. The AE was calculated (**Figure 2**)  
183 as the angle between the straight line connecting the center of the workspace with the intended target  
184 and the straight line connecting the center of the workspace with the actual position of the cursor at 2.6  
185 cm from the center (equivalent to 4 N of force exerted) during each movement. This distance was  
186 selected based on the data-driven observation (**Figure 3A, B and C and Figure 4A**) that subjects started  
187 compensating for angular errors only after about half of the movement trajectory (equivalent to 7.5 N),  
188 thus the metric allows to capture a point in time where the subject is “committed” to the movement but  
189 has not yet started compensating for the initial shooting error. In the analysis of Experiment 2, we  
190 analyzed the AE metric as a function of the distance between the target analyzed and the perturbed  
191 target. In this analysis, we pooled together the data relative to the AD phase of each macro-block and  
192 we calculated the average (across macro-blocks and subjects) AE for each target as a function of their  
193 angular distance from the perturbed target. Moreover, we analyzed the behavior of the AE metric both  
194 for the repetitions of the perturbed target only and for the repetitions of its 4 (2 clockwise, 2  
195 counterclockwise) closest targets.

### 196 **EMG signal recording and processing**

197 EMG signals were recorded, during both experiments, from the following 13 upper limb muscles:  
198 Brachioradialis (BRD), Biceps brachii short head (BSH), Biceps brachii long head (BLH), Triceps  
199 brachii lateral head (TLT), Triceps brachii long head (TLN), Deltoid Anterior (DANT), Medial  
200 (DMED) and Posterior (DPOST) heads, Pectoralis Major (PM), Inferior head of the Trapezius (TRAP),  
201 Teres Major (TMAJ) and Latissimus Dorsi (LD). EMG signals were recorded through a Delsys Trigno

202 system (Delsys, US), sampled at 2000 Hz and synchronized with the load cell. EMG signals were first  
203 filtered in the 20Hz-400Hz band by using a 3rd order digital Butterworth filter. The envelopes were  
204 then obtained by rectifying the signals and applying a low pass filter (3rd order Butterworth) with a cut-  
205 off frequency of 10Hz. Before muscle synergies extraction, all the envelopes were amplitude  
206 normalized. The normalization was done with respect to the subject- and session-specific reference  
207 values calculated for from the initial normalization block. During the normalization block, subjects  
208 reached three times to 8 targets spaced at 45°. The EMG envelopes were extracted using the same  
209 procedure previously described. The peak amplitude of each envelope during each movement was  
210 calculated. For each muscle the target yielding its maximal activation was identified. The reference  
211 normalization value for each muscle was established as the average value across the three peak values  
212 recorded across the repetitions of the target maximizing the muscle's activity.

### 213 **Semi-fixed synergies model and synergy extraction**

214 In the muscle synergies model, a matrix  $M$  containing  $s$  samples of the envelopes obtained from the  
215 EMGs recorded from  $m$  muscles is decomposed, using the non-negative matrix factorization (NMF)  
216 algorithm (Lee and Seung, 2001), as the combination of  $n$  muscle synergies  $M \approx W \cdot H$ , where  $W$   
217 represent a matrix of  $m \cdot n$  synergy weights and  $H$  represents a matrix of  $n \cdot s$  synergy activation  
218 patterns.

219 We and others have shown (Gentner et al., 2013; De Marchis et al., 2018; Zych et al., 2019) that  
220 adaptations to perturbations in several different tasks are well represented by the changes in the  
221 activation patterns  $H$  of fixed sets of muscle weights  $W$  extracted by applying the NMF algorithm to  
222 sets of EMG signals recorded during unperturbed versions of the tasks under analysis. This analysis is  
223 usually performed by altering the NMF algorithm by fixing the values of  $W$  while allowing the update  
224 rule of the NMF algorithm to modify only the values of  $H$ . The validity of the fixed-synergies model is  
225 often evaluated by showing that the EMG reconstructed using the fixed set of  $W$  and the new  $H$  can  
226 capture the variance of the data up to an arbitrary satisfactory level.

227 There are some conceptual and technical limitations to the fixed-synergies approach. In first instance,  
228 this model requires that the muscle synergies are fully represented, at the neurophysiological levels, by  
229 the matrix  $W$ , which hard codes the relative activations of the different muscles relative to each synergy  
230 module. Even if the neurophysiological muscle synergies were consistent with this spatially fixed  
231 synergistic model (rather than, e.g., a dynamic synergy model such as the ones described in (d'Avella  
232 et al., 2003) and (Delis et al., 2014)), it is unlikely that the relative activation of the different muscles  
233 would be hard-fixed, but rather “stabilized” by the neurophysiological substrates encoding the  
234 synergies. We found, in fact, that single muscular activations can be altered, within the synergies,  
235 depending on task demands (Zych et al., 2019).

236 Moreover, a technical limitation of the standard fixed-synergies approach lies in the fact that EMG  
237 recordings can undergo changes in conditions during a recording session (e.g. sweat during long tasks  
238 can alter the signal-to-noise ratio of a channel) and between recording sessions, thus by fixing the  
239 relative weights between the muscles we may lose variance in the reconstructed data caused by  
240 exogenous, rather than endogenous, changes in the EMGs. For these reasons we here introduce the  
241 semi-fixed synergies model. In this model, the synergy weights  $W^{BL}$  extracted during an unperturbed  
242 baseline task are used to determine the range over which the single muscle contributions to the synergy  
243 weights extracted during adaptation can vary. Specifically, given:

$$244 \quad M_{m,s}^{Ref} \approx W_{m,n}^{Ref} \cdot H_{n,s}^{Ref}$$

245 With  $W_{m,n}^{Ref}$  and  $H_{n,s}^{Ref}$  respectively the synergy weights and activation patterns extracted by applying  
246 the NMF algorithm on a reference (unperturbed) dataset, with the matrices  $W_{m,n}^{Ref}$  and  $H_{n,s}^{Ref}$   
247 appropriately scaled so that  $0 < W_{m,n}^{Ref} < 1$ , and given a weight tolerance  $\delta$ , indicating the variability  
248 allowed around the values of  $W_{m,n}^{Ref}$  during the extraction of the muscle synergies for the  
249 adaptation/post-adaptation conditions, the semi-fixed synergies model bounds the results of the standard  
250 multiplicative update rule of the NMF on the weights so that:

$$251 \quad \max(0; W_{m,n}^{Ref} - \delta) < W_{m,n}^{Exp} < \min(W_{m,n}^{Ref} + \delta; 1)$$

252 Thus, in the semi-fixed synergies model, the weights of the muscle synergies extracted during the  
253 different experimental phases are not fixed but bounded around the values of the weights extracted  
254 during the reference part of the dataset. The values of  $H_{n,s}^{Exp}$  are left completely free to change, as in the  
255 fixed-synergies model. In the semi-fixed model most of the variability of the data between a baseline  
256 and an adaptation/post-adaptation condition is described by changes in the synergy activation patterns,  
257 while a smaller part of such variability is ascribed to changes in the weights.

258 In all our subsequent analyses, the value of  $\delta$  was fixed to 0.1, meaning that the weights of the individual  
259 muscles in a synergy were allowed a 10% variability in the positive and negative directions with respect  
260 to their values in the reference synergy weights. In the analysis of Experiment 1, the reference  $W^{Ref}$  was  
261 calculated from the data pooled from the BL blocks relative to the 3 macro-blocks. The envelopes  
262 calculated singularly from each BL blocks were concatenated in the temporal order in which the subject  
263 experienced them and then smoothed using a 4-points average filter. Similarly, in the analysis of  
264 Experiment 2 the reference  $W^{Ref}$  was calculated from the data pooled from all the 8 BL blocks relative  
265 to the 8 different macro-blocks, following the same procedure as for Experiment 1.

266 After the extraction of the reference synergies, the semi-fixed  $W$  and  $H$  were extracted from all the  
267 experimental blocks of both experiments (including the single BL ones) using the procedure for semi-  
268 fixed synergies extraction previously described. In all our analyses, the number of muscle synergies  
269 extracted was fixed to 4. This number of synergies was found by us and others (Berger et al., 2013;  
270 Gentner et al., 2013; De Marchis et al., 2018) to well represent the variability of the upper limb muscular  
271 activations during planar isometric reaching movements. Moreover, the 4 synergies have been shown to  
272 have distinct activation sub-spaces (as determined by the RMS of the activation of each synergy relative  
273 to each target, see later) that heterogeneously cover the whole planar workspace, with each synergy  
274 spanning approximately  $90^\circ$  (De Marchis et al., 2018).

275 We evaluated the quality of the envelope reconstruction obtained in each block using the semi-fixed  
276 synergy model by calculating the  $R^2$  between the original envelopes and the envelopes obtained by  
277 multiplying  $W^{Exp}$  and  $H^{Exp}$ . To assess for statistically significant differences in  $R^2$  across the different  
278 blocks we employed ANOVA for comparing the average (across macro-blocks)  $R^2$  obtained in each  
279 block, for both experiments. Finally, in order to justify subsequent group analyses on the synergy  
280 activations, we evaluated the similarity between the  $W^{Ref}$  extracted from each subject using the  
281 normalized dot product. In order to do so, we calculated, for each subject, the similarity between the  
282  $W^{Ref}$  matrix of the subject and the  $W^{Ref}$  matrices of all the other subjects and then averaged it, so to obtain  
283 a subject-specific similarity measure.

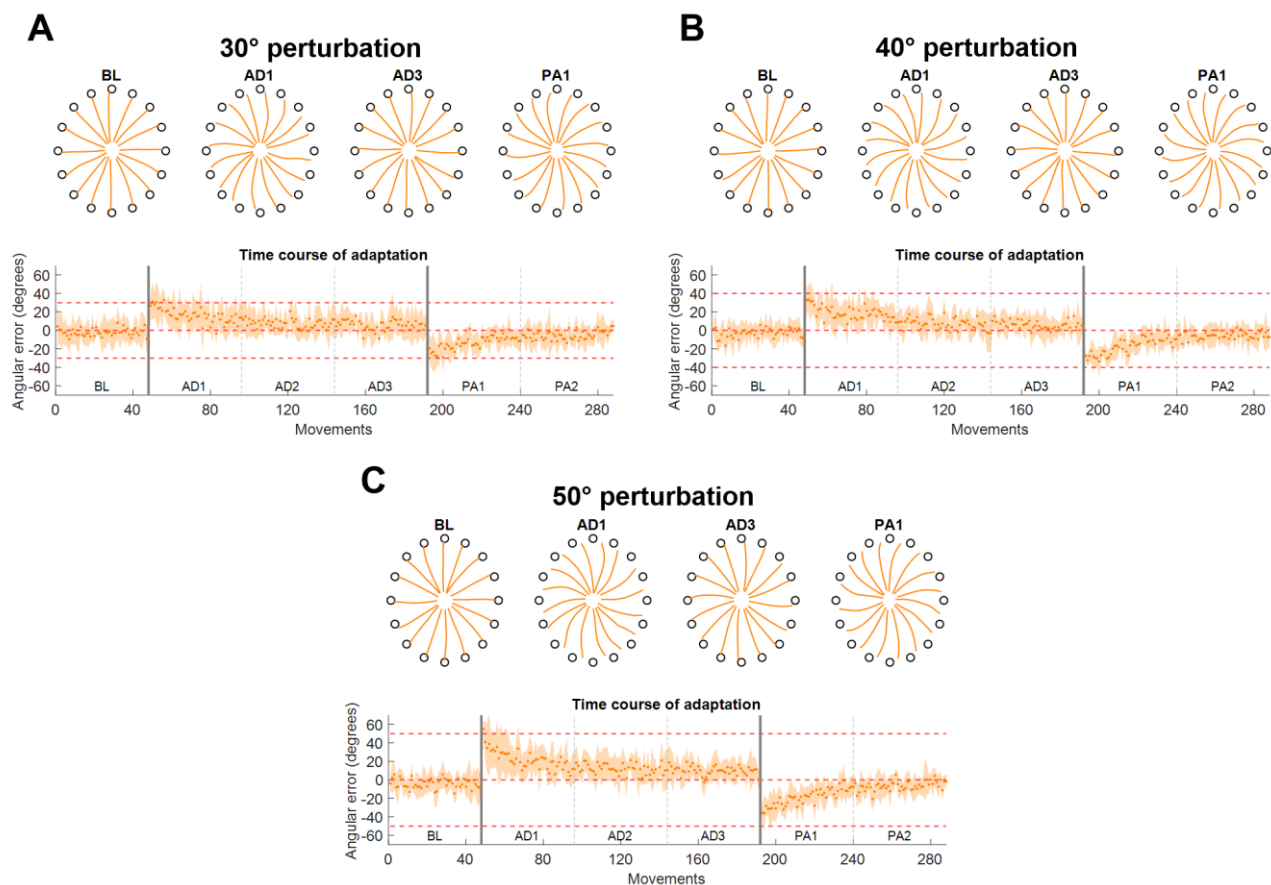

**Figure 3. Force trajectories and angular error (AE) results for Experiment 1.** Each panel presents the results for a different perturbation angle (A for 30°, B for 40° and C for 50°). Each panel presents, on the top plot, the average (across subjects and repetitions) force trajectories for the last 5 movements of BL, the first 5 movements of the first block of AD (AD1), the last 5 movements of the last block of AD (AD3) and the first 5 movements of the first block of PA (PA1). The bottom plot presents the average (across subjects) values of AE for each movement across all blocks. The two vertical grey lines represent the onset and offset of the visual rotation. Horizontal red dotted lines represent the angle of the perturbation.

## 284 Synergy and muscle rotation analysis

285 Previous works have shown that adaptations to visuomotor rotations during planar isometric movements  
286 are well described by rotations of the sub-spaces where the different synergies and muscles are active  
287 in the overall workspace (Gentner et al., 2013; De Marchis et al., 2018). Here we employed the same  
288 analysis in both experiments in order to characterize how adapting to different perturbation angles  
289 (Experiment 1) and in different sub-spaces (Experiment 2) modifies the activation patterns of the muscle  
290 synergies. In order to do so we first estimated the workspace covered by each of the synergies in each  
291 experimental block.

292 This was done by: i) segmenting the  $H$  matrix calculated for each block by extracting the sub-portion  
293 of  $H$  relative to the center-out phase of each reaching movement, from the instant when the target  
294 appeared on screen to the instant when the target was reached; ii) calculating the RMS of the  $H$  for each  
295 reaching movement; iii) averaging the values of RMS across the different repetitions of each target in  
296 a block. For all blocks (BL, AD and PA of each macro-block) in Experiment 1 and for the BL and PA  
297 blocks in Experiment 2 the average was calculated across all three repetitions of each target. For the  
298 AD block of Experiment 2, the RMS values relative to the unperturbed targets were also averaged across  
299 all three target repetitions in the block, while those relative to the perturbed target (which the subjects  
300 experienced 61 times in the training block) were averaged across the last 3 interspersed repetitions that  
301 they experienced in the block before the final 5 continuous ones. This choice was suggested by the  
302 results obtained while analyzing the biomechanical characteristics of adaptation in Experiment 2  
303 (**Figure 4D**), that showed that subjects had reached adaptation during the final part of the interspersed  
304 trials, while still showing the influence of the presence of the non-perturbed trials.

305 We then calculated the preferred angle spanned by the activation pattern of each single synergy in the  
306 workspace (d'Avella et al., 2006). Preferred angles were calculated from the parameters of a cosine fit  
307 between the average RMS of each synergy activation and the corresponding target position. RMS values  
308 were fitted using a linear regression in the form:  $RMS(\theta) = \beta_0 + \beta_1 \cos(\theta) + \beta_2 \sin(\theta)$ . The preferred  
309 angle of the fit was then calculated from the fitting parameters as  $\vartheta = \tan^{-1}(\beta_2/\beta_1)$ . Only preferred  
310 angles calculated from significant ( $p < 0.05$ ) fittings were used in subsequent analyses. In both

311 experiments we evaluated the difference in preferred angles between the BL blocks and the different  
 312 AD and PA blocks. We refer to these differences as the rotations in preferred angles, or tunings, due to  
 313 the adaptation process.

314 In Experiment 1, we analyzed the rotation of each synergy for each subject during all the AD and PA  
 315 blocks of each macro-block. Moreover, we also evaluated the rotation of the average (across subjects)  
 316  $RMS(\theta)$  of each synergy at AD3 for all three perturbation angles.

317 In Experiment 2, in each macro-block, we analyzed the rotation of each synergy of each subject for  
 318 each perturbed target during AD. We grouped the rotations relative to the adaptations to the different

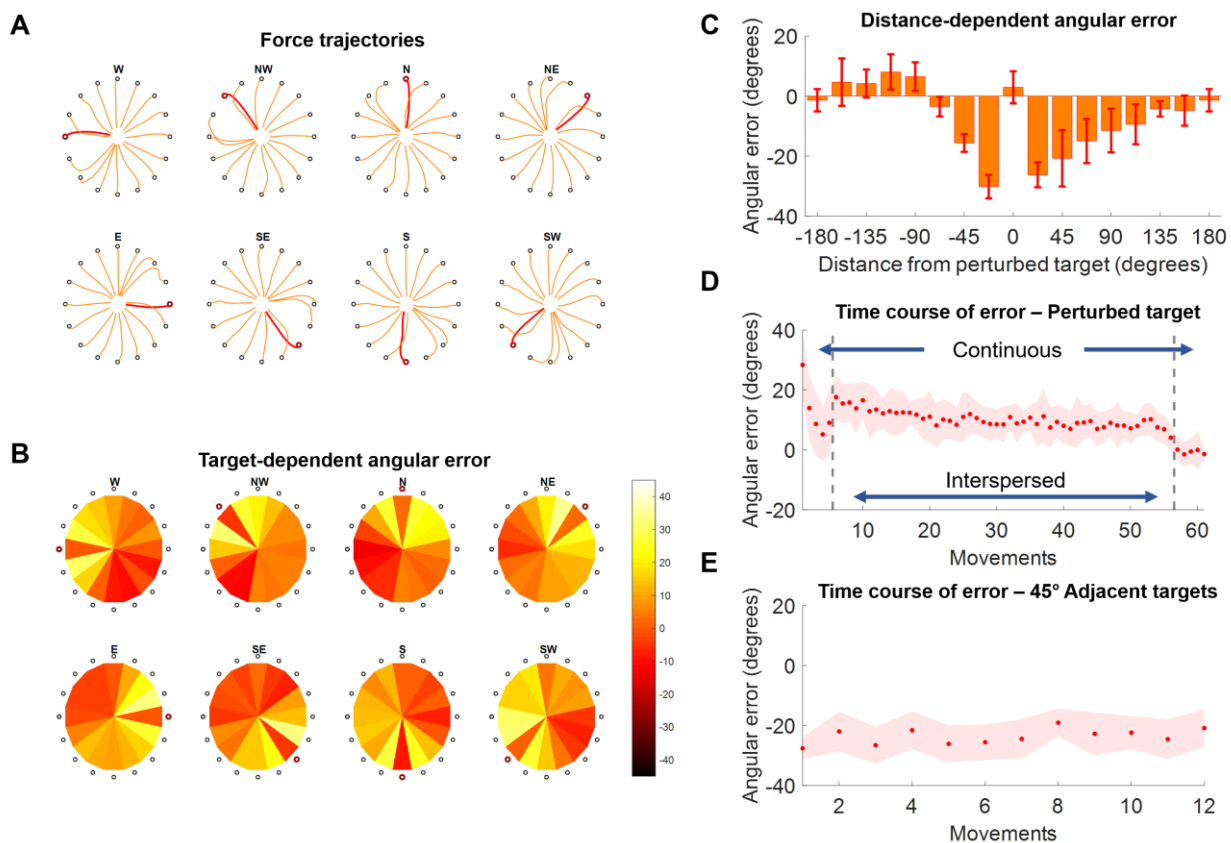

**Figure 4. Force trajectories and angular error (AE) results for Experiment 2.** (A) Force trajectories for the last 5 movements of each target during AD, for each perturbed target. Trajectories for the perturbed target are in red. (B) Average values of AE for the last 5 movements of each target during AD, for each perturbed target. Each pie chart presents the average across all subjects. (C) Distribution of average (across subjects and targets) AE values for the last 5 repetitions of each target grouped with respect to the distance between the target and the perturbed one (where 0 indicates the perturbed target itself). (D) Average (across subjects) AE values for all the perturbed targets across all the repetitions of the AD block. During the first and last 5 repetitions the perturbed target is presented continuously, while in the middle section of the experiment (denoted by the two vertical grey dashed lines) the perturbed targets are presented interspersed with all the other targets. (E) Average (across subjects) AE values of the 4 targets between  $-45^\circ$  and  $45^\circ$  of the perturbed one, in order of occurrence (12 total occurrences).



319 perturbed targets depending on the angular distance between the perturbed target and the preferred angle  
320 of each synergy. We did this both across all perturbed targets and synergies and for each perturbed  
321 target singularly by ranking the synergies from the closest to the furthest to the perturbed target in terms  
322 of absolute angular distance with the synergy preferred angle.

323 Finally, as a validation of our approach, we calculated the preferred angles also for each of the 13  
324 muscles and then calculated the rotations that these preferred angles incurred between BL and AD3 in  
325 Experiment 1 and between BL and AD for Experiment 2, using the same procedures we employed for  
326 the synergies activation patterns. We then assessed if the rotation of the single muscles correlated with  
327 the rotation of the synergies to which they contribute. A muscle was considered as contributing to a  
328 synergy if its weight in the synergy was above 0.25 (De Marchis et al., 2015) where, in our model, the  
329 maximum value that a muscle can have in a synergy is 1. We evaluated the correlation using Pearson's  
330 coefficient, applied to the data pooled across subjects, synergies and experiments.

331

## 332 **Results**

### 333 **Force Trajectories**

334 The results on the analysis of the force trajectories and the AE metric for Experiment 1 followed closely  
335 the results obtained in literature in similar experiments (Krakauer et al., 1999; Krakauer et al., 2000;  
336 Wigmore et al., 2002; Gentner et al., 2013). Across the three perturbation angles, we found that subjects,  
337 on average, presented increasing values of AE with increasing perturbation angles in the first movement  
338 of the first AD block ( $26.9 \pm 15.3^\circ$ ,  $33.0 \pm 14.0^\circ$  and  $55.4 \pm 9.7^\circ$  for the  $30^\circ$ ,  $40^\circ$  and  $50^\circ$  perturbations  
339 respectively) and they were subsequently able to adapt and come back to a smaller AE ( $<7^\circ$  on average  
340 in the last 5 movements of each AD3 block for all three perturbations) through the repetitions of the  
341 different movements in the three AD blocks (**Figure 3A**, **3B** and **3C**). The adaptation exhibited an  
342 exponential behavior.

343 In Experiment 2 we found that subjects were able to adapt their force trajectories to perturbations  
344 applied to a single target (**Figure 4A**). Subjects were able to minimize the AE metric for the trained

345 target, and this was mirrored by an increase in the same metric for the adjacent, unperturbed, targets  
346 (**Figure 4B**). We found that targets positioned both clockwise and counterclockwise with respect to the  
347 perturbed target were affected by the adaptation and presented rotations opposite in direction with  
348 respect to the angle of the visual perturbation (**Figure 4C**). Targets positioned clockwise with respect  
349 to the perturbed target presented substantial counter-rotations up to about 120° of angular distance to  
350 the perturbed target, while the same effect was present counterclockwise only up to about 70° of angular  
351 distance (**Figure 4C**).

352 At the temporal level, the perturbed targets first exhibited a decrease in AE metric during the 5  
353 continuous movements at the beginning of the AD trial (**Figure 4D**). The average values of AE  
354 increased as subjects began to experience the unperturbed targets interspersed with the perturbed one.  
355 Nevertheless, they were able to compensate for the presence of the unperturbed targets and reached an  
356 average value of AE <10° by the end of the interspersed phase. They were finally able to reach an AE  
357 value close to 0° during the last 5 continuous perturbed movements. On the other hand, the 4 45°-  
358 adjacent targets (2 clockwise and 2 counterclockwise) presented a constant average AE value (about  
359 25° of counterclockwise rotation) across their 12 repetitions (3 per target), indicating that the effect of  
360 the adaptation for the perturbed target over the unperturbed ones was maintained constant over the AD  
361 block (**Figure 4E**).

### 362 **Synergy extraction and validation of the semi-fixed synergy model**

363 Consistently with what we previously showed (De Marchis et al., 2018), we found that 4 synergies can  
364 well represent the activity of all the muscles during both experiments. The 4 synergies were distinctly  
365 distributed in the different quadrants of the workspace and presented consistent preferred angles across  
366 the different subjects. In the following the preferred angles will be indicated using the left-most target  
367 (W in a compass rotation) as 0° and increasing clockwise and the workspace will be referenced to by  
368 using the terms far and close for the upper and lower parts and lateral and medial for the left and right  
369 parts of the workspace, using the right arm as reference (**Figure 5A and 5D**).

370 One synergy (red in all the plots) was characterized by the activation of the elbow flexors and was active  
 371 in the close-medial quadrant of the workspace. This synergy presented a preferred angle of  $305.1 \pm$   
 372  $17.3^\circ$  for Experiment 1 and  $307.1 \pm 12.9^\circ$  for Experiment 2; one synergy (green) was characterized by  
 373 the activation of the deltoids (medial and anterior), pectoralis and trapezius and was mostly active in  
 374 the far-medial quadrant of the workspace. This synergy presented a preferred angle of  $130.4 \pm 12.4^\circ$  for  
 375 Experiment 1 and  $131.6 \pm 14.1^\circ$  for Experiment 2; one synergy (azure) was characterized by the  
 376 activation of the triceps, deltoid posterior and infraspinatus and was mostly active in the far-lateral  
 377 quadrant of the workspace. This synergy presented a preferred angle of  $217.3 \pm 14.4^\circ$  for Experiment 1  
 378 and  $206.8 \pm 15.1^\circ$  for Experiment 2; one synergy (yellow) was characterized by the activation of the

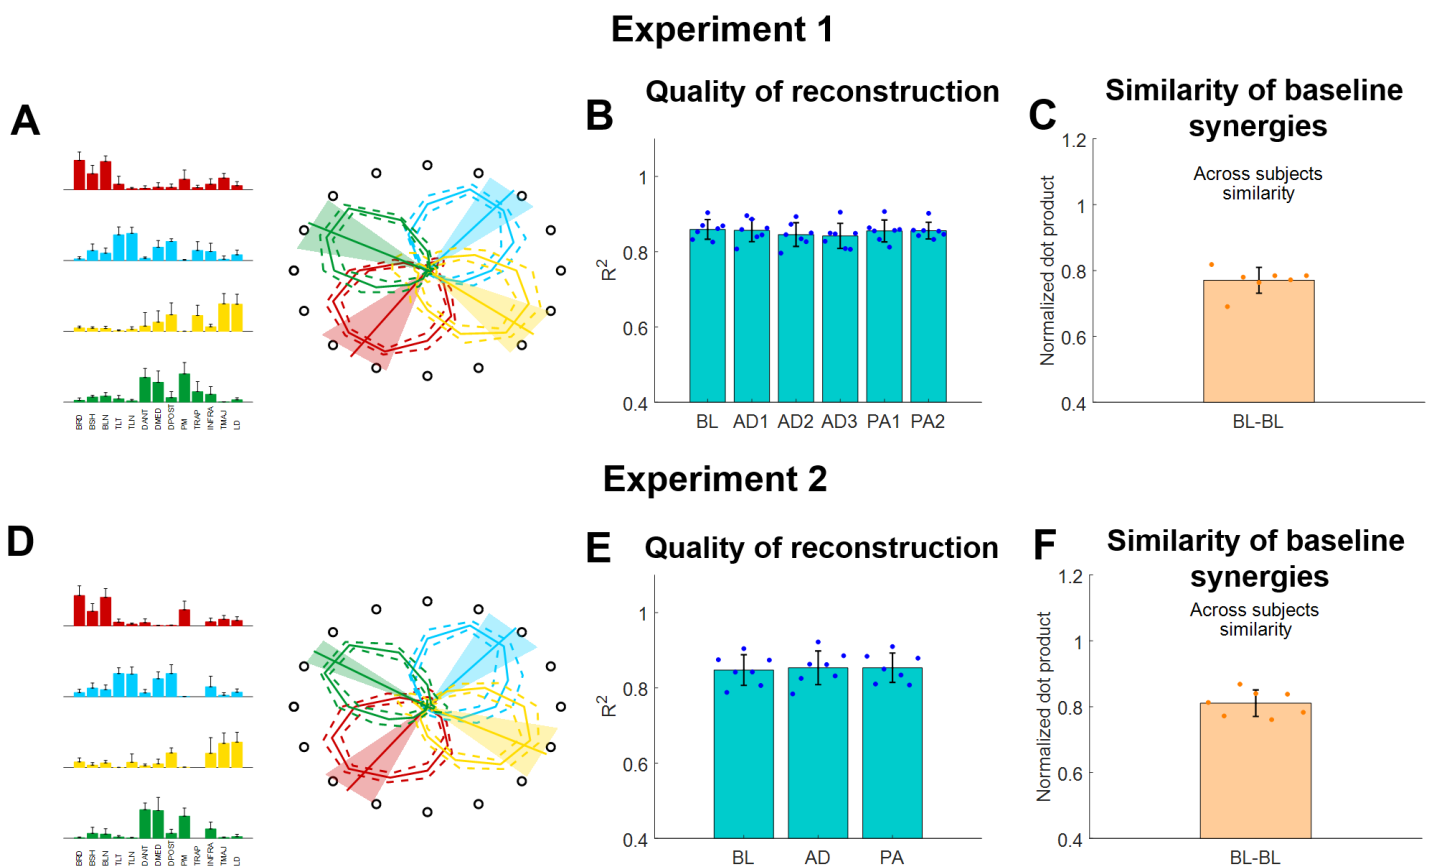

**Figure 5. Muscle synergies extracted using the semi-fixed algorithm for both experiments. (A and D)** Baseline synergy weights (average and standard deviations across subjects) and preferred angles across the workspace (bold line represents the average across subjects, shaded areas represent the standard deviation). **(B and E)**  $R^2$  of reconstruction for the synergies extracted from each block using the semi-fixed algorithm. Blue dots indicate the values of each individual subjects (averaged across macro-blocks), bars and whiskers indicate the average across subjects and the standard deviation. **(C and F)** Similarity of baseline synergies across subjects. Each dot represents the average similarity between one subject and all the other subjects. Bar and whiskers indicate the average across subjects and the standard deviation.

379 latissimus dorsi and teres major and was mostly active in the close-lateral quadrant of the workspace.  
380 This synergy presented a preferred angle of  $26.9 \pm 15.0^\circ$  for Experiment 1 and  $15.8 \pm 7.1^\circ$  for  
381 Experiment 2 (**Figure 5A** and **5D**).

382 The 4 synergies were able to well describe the variability of the data for the reference datasets (obtained,  
383 in both experiments, by pooling together the data of the BL blocks). We observed an average (across  
384 subjects)  $R^2$  of  $0.86 \pm 0.04$  for the reference synergies extracted during Experiment 1 and an average  $R^2$   
385 of  $0.84 \pm 0.05$  for the reference synergies extracted during Experiment 2. When analyzing the average  
386 (across subjects and macro-blocks)  $R^2$  for the different experimental blocks as reconstructed using the  
387 semi-fixed synergies algorithm from the reference synergies, we found that the  $R^2$  values were above  
388 0.8 for all blocks in Experiment 1 (**Figure 5B**). Moreover, we did not observe statistically significant  
389 differences among the different blocks ( $p = 0.98$ , ANOVA 1-way). The same results were observed also  
390 for Experiment 2 (**Figure 5E**), where the data reconstructed using the synergies extracted using the semi-  
391 fixed approach maintained an average (across subjects and macro-blocks)  $R^2 > 0.8$ , with no statistically  
392 significant differences across the different blocks ( $p = 0.99$ , ANOVA 1-way).

393 Finally, we analyzed the across-subjects similarity between the reference baseline synergies calculated  
394 for each subject. We found an average similarity of  $0.77 \pm 0.04$  for Experiment 1 and of  $0.81 \pm 0.04$  for  
395 Experiment 2, indicating that subjects have similar synergies among them in both experiments.

## 396 **Synergies Rotations**

397 In this analysis we evaluated how the workspace spanned by the activation patterns of each synergy  
398 changed during the different adaptation exercises. In Experiment 1 we found that, for all three  
399 perturbation angles, the synergies rotate almost solitarily (**Figure 6A**) by angles close to the one of the  
400 visual perturbations (**Figure 6B, 6C** and **6D**). These results are in line with what presented in (Gentner  
401 et al., 2013), where the author showed that a  $45^\circ$  visual rotation induces a rotation of the activation  
402 pattern of the synergies close to  $45^\circ$ .

403 We analyzed the average (across synergies) rotation of the synergy workspace for each subject in each  
404 block (**Figure 6B**). Here we observed that subjects, across the three perturbations, appear to increase

405 their average synergy rotation after the first block and achieve maximal rotation in the 3<sup>rd</sup> (30°  
 406 perturbation) or 2<sup>nd</sup> (40° and 50° perturbations) block of adaptation. Subjects do not appear to show an  
 407 after-effect in the synergies, but rather a small residual rotation. This result is expected and was  
 408 previously observed in another adaptation study (Zych et al., 2019) and indicates that biomechanical  
 409 after-effects such as the ones observed in **Figure 3** arise from the utilization of the adapted synergies in  
 410 the unperturbed space.

411 For the rotations calculated from the average (across subjects) synergy  $RMS(\theta)$  at AD3 (**Figure 6C**),  
 412 we found rotations spanning from 24.6° (red synergy) to 32.5° (azure synergy) for the 30° perturbation,  
 413 31.4° (green synergy) to 40.4° (yellow synergy) for the 40° perturbation and 41.3° (green synergy) to  
 414 43.4° (azure synergy) for the 50° perturbation. We found similar results for the rotations calculated  
 415 from the data of each single subject (**Figure 6D**), although subjects exhibited high variability among  
 416 them for each combination synergy/perturbation-angle. We observed a range of median rotations

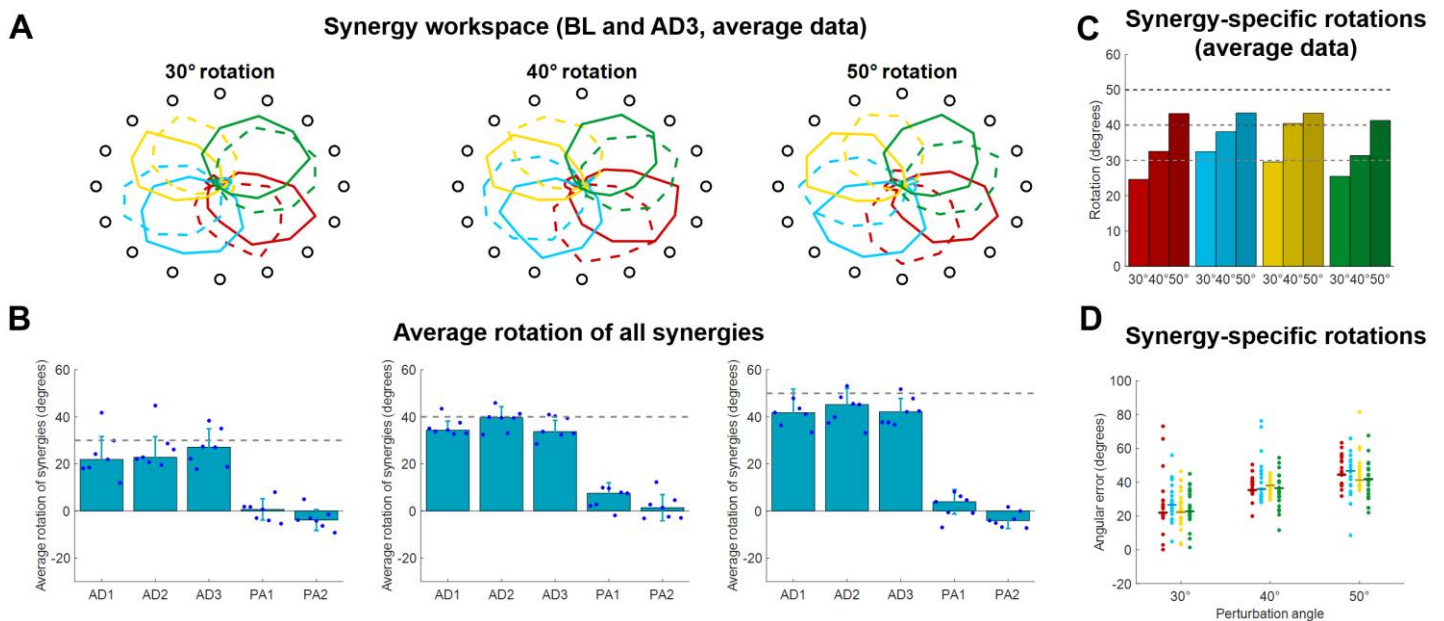

**Figure 6. Synergies rotations for Experiment 1.** (A) Average (across subjects)  $RMS(\theta)$  of synergies activations for each target for BL (solid lines) and AD3 (dashed lines) for all three perturbation angles. (B) Average synergies rotation, with respect to their preferred angles at BL, for each block in each macro-block. Individual dots represent the data for each subject, as average rotations of all the 4 synergies. Bars and whiskers represent the average and standard deviation across subjects. The dashed grey lines represent the angle of the visual rotation. (C) Rotations at AD3 for each synergy in each macro-block, calculated from the average (across subjects) intensity of synergy activation (as in A). (D) Rotations at AD3 for each synergy in each macro-block calculated for each single subject (dots). The horizontal lines indicate the median rotation across subjects.

417 spanning from 21.9° (red synergy) to 26.6° (azure synergy) for the 30° perturbation, 35.5° (red synergy)  
418 to 36.8° (yellow synergy) for the 40° perturbation and 43.3° (yellow synergy) to 46.6° (azure synergy)  
419 for the 50° perturbation.

420 In Experiment 2 we tried to characterize how the different synergies rotate when only a sub-space of  
421 the workspace is perturbed. An initial visual analysis of the average (across subjects) synergies  $RMS(\theta)$   
422 at BL and AD (**Figure 7**) sparked two initial observations: i) only the synergies involved in the reaching  
423 to the perturbed target are rotated in the adaptation process; ii) synergies whose preferred angle is close  
424 to the angle of the target being perturbed are not rotated. These two observations are equivalent to the  
425 observation that synergies are rotated only if engaged at the boundaries of their activation workspace.

426 The analyses of the synergy rotations of the single subjects confirm this observation. We observed that  
427 each synergy is maximally rotated during the adaptation to the perturbed target that is approximately  
428 90° clockwise with respect to the preferred angle of the synergy at baseline (**Figure 8A**). This  
429 observation is true for all 4 synergies, although they seem to exhibit different degrees of “sensitivity”  
430 to the adaptation process. In this regard, the azure synergy is only rotated for perturbed targets that are  
431 45° to 120° clockwise with respect to the synergy preferred angle and the yellow synergy exhibits small  
432 values of rotation during almost all adaptation blocks. The analysis of the rotations for the 4 synergies  
433 pooled together further confirms the original observation (**Figure 8B**) and shows that the rotation of the  
434 synergies is close to 0° when the preferred angle of the synergy is very close (< 20°) to the perturbation  
435 angle. The rotation then increases in the clockwise direction reaching a maximum of about 20° at about  
436 90° of distance between the perturbation angle and the synergy preferred angle and decreasing  
437 afterwards. In the counterclockwise direction, we observed an increase in rotation up to about a distance  
438 of 60° and inconsistent results afterwards.

439 As an additional analysis we ranked, for each perturbation angle, the synergies from closest to furthest  
440 in absolute angular distance to the perturbed target (**Figure 8C**). We observed, once again, that  
441 synergies closer to the perturbation angle exhibit the smallest rotation, while higher rotations are  
442 observed in the second and third closest synergies. In this analysis, it is also possible to notice the high  
443 variability exhibited by the rotations. This variability may be inherent to the phenomenon observed or



444 derived from the methodology employed, where raw data are first factorized, then segmented and then  
445 fitted to a cosine fit, with each passage potentially introducing additional variability.

446 In order to validate our approach of analyzing adaptations in the synergies, rather than muscular, space,  
447 we analyzed how the single muscles rotate, on average, in both experiments. In Experiment 1, we found  
448 (**Figure 9A**) that the average rotation of the muscles increased with the perturbation angle, with average  
449 values across subjects equal to  $24.6 \pm 4.6$ ,  $29.6 \pm 3.8$  and  $41.3 \pm 3.5$  for the  $30^\circ$ ,  $40^\circ$  and  $50^\circ$   
450 perturbations respectively. In Experiment 2, we once again analyzed the relationship between the  
451 muscle rotation and the distance between the baseline preferred angle (of the muscles in this case) and  
452 the angle of the perturbation, in a homologue of the analysis presented in **Figure 8B**. We found (**Figure**  
453 **9B**) that muscular rotations held a behavior consistent with that observed in the synergies (**Figure 8B**)

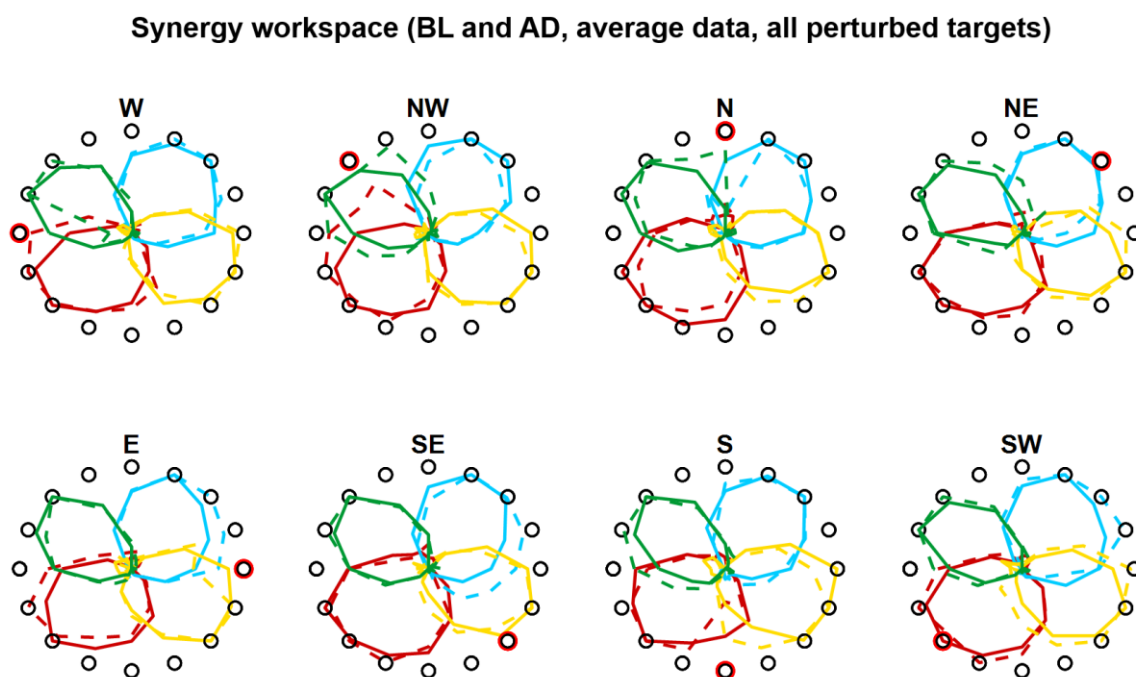

**Figure 7. Synergies rotations for Experiment 1.** (A) Average (across subjects)  $RMS(\theta)$  of synergies activations for each target for BL (solid lines) and AD (dashed lines) for all perturbed targets. In the AD block, for the unperturbed targets the values are calculated from all three repetitions of each target, while the values for the perturbed targets are calculated from the last 3 repetitions during the interspersed phase of the block (see Fig. 1D and 4D)



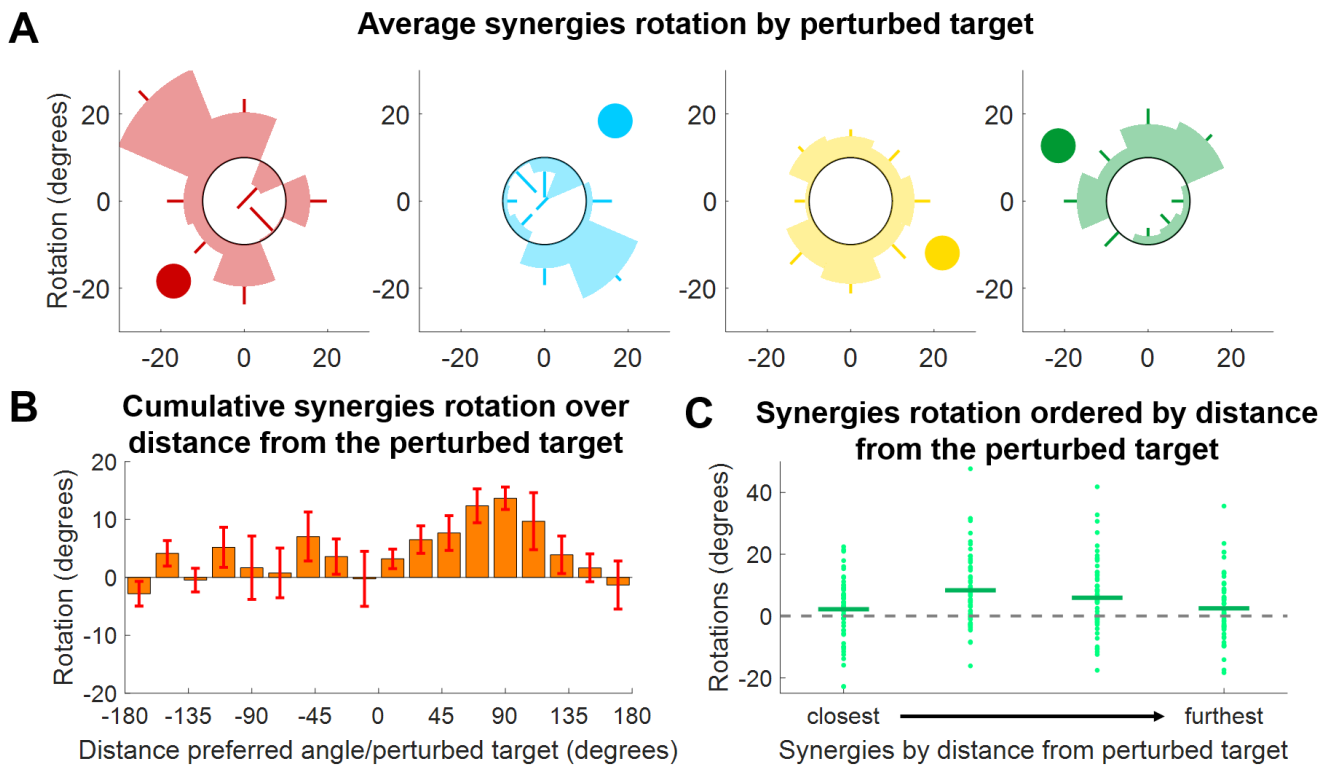

**Figure 8. Synergies rotations for Experiment 2.** (A) Average (across subjects) rotation for each synergy (color-coded) and for each perturbed target. Each segment of each polar plot represents a perturbed target. The darker circle represents the direction of the preferred angle for each synergy at BL. (B) Distribution of average (across subjects, targets and synergies) synergy rotation values as a function of the distance between the synergy preferred angle and the perturbed target. Bars represent averages, whiskers standard deviations. (C) Synergies rotations for each macro-block after ordering the synergies from the closest to the perturbed target to the furthest. Individual dots represent the rotation of each single synergy (56 total dots, 8 targets times 7 subjects). Horizontal lines represent the median across all the individual values.

454 by which muscles with preferred angles close to the perturbed targets are not rotated during the  
 455 adaptation, while rotations increase in the clockwise direction up to a maximum distance of about 90°  
 456 to 110°. Counterclockwise we observed rotations only for angular distances between the preferred angle  
 457 and the perturbation that are smaller than 60°, as in the synergies analysis. Finally, we compared the  
 458 rotations of the single muscles with the rotation of the synergies to which those muscles contribute to.  
 459 In this analysis (**Figure 9C**) we observed a moderate significant linear correlation between the rotation  
 460 of the synergies and of the muscles, characterized by a value  $\rho = 0.57$ . We found that the angular  
 461 coefficient of the line better fitting the data was equal to 0.59, indicating an overall underestimation of  
 462 the rotation in the synergy-based analysis, that appears to depend mostly from an underestimation of  
 463 negative rotations.

## 464 **Discussion**

465 In this study we sought to investigate how adaptations to visuomotor rotations are achieved in the  
466 neuromuscular space. We studied how muscular co-activations, modeled using muscle synergy  
467 analysis, are modified when different angular rotations are used to perturb the mapping between the  
468 force exerted and the visual feedback provided to the individuals during isometric contractions.

469 Specifically, we investigated how different rotations angles applied to the whole workspace and the  
470 same rotation applied to small sub-spaces modify the activations of the synergies. In our analysis we  
471 were particularly interested in identifying generalizable behaviors that could be potentially used to  
472 model the effect of a given visual perturbation on the neuromuscular control.

473 We found strong evidences supporting the observations that muscular activations and their synergistic  
474 homologues are tuned proportionally to the perturbation angle (**Figure 6** and **Figure 9A**) and only when  
475 engaged at the boundaries of their workspace (**Figure 7**), and with an angle proportional to the distance  
476 between the perturbed sub-space and the preferred direction of the muscle/synergy (**Figure 8** and **9B**).  
477 Our analysis shows that such behaviors are consistent whether analyzing muscular or synergies  
478 activations (**Figure 9B** and **9C**), further strengthening the argument that synergies analysis can well  
479 describe adaptations to visuomotor rotations (Berger et al., 2013; Gentner et al., 2013; De Marchis et  
480 al., 2018).

481 In a previous work (De Marchis et al., 2018) we showed that adapting to perturbations affecting two  
482 sub-spaces of the whole workspace leads to different synergies rotations depending on the order in  
483 which the two perturbed sub-spaces are experienced. One of the aims of the work we present here was  
484 to investigate whether these differential neuromuscular paths to adaptation may depend on the  
485 relationship between the workspace covered by each single synergy and the spatial characteristics of  
486 the sub-space being trained.

487 Here we found evidences of such relationship that may help explain our previous results. In fact, we  
488 observed that the presence and extent of tuning in the synergies depend on the distance between the  
489 synergy preferred angle and the direction of the perturbed target.  
490 Our results show that adapting for a 45° rotation applied to a sub-space does not lead to a precise 45°  
491 rotation of all the synergies, but leads to different rotations of the subset of synergies that are active in  
492 the sub-space, with the amount of rotation depending, for each synergy, on the spatial characteristics of  
493 the perturbed sub-space. In a scenario like the one we tested in our previous work (De Marchis et al.,  
494 2018), where two groups of subjects adapted for a 45° rotation applied to two sub-spaces experienced  
495 in opposite order, each group, after the first adaptation bout, achieved a different adapted neuromuscular  
496 state, as characterized by different tunings in the synergies. Therefore, each group had a different  
497 “starting” set of synergies preferred angles before the second adaptation bout and this could have led to

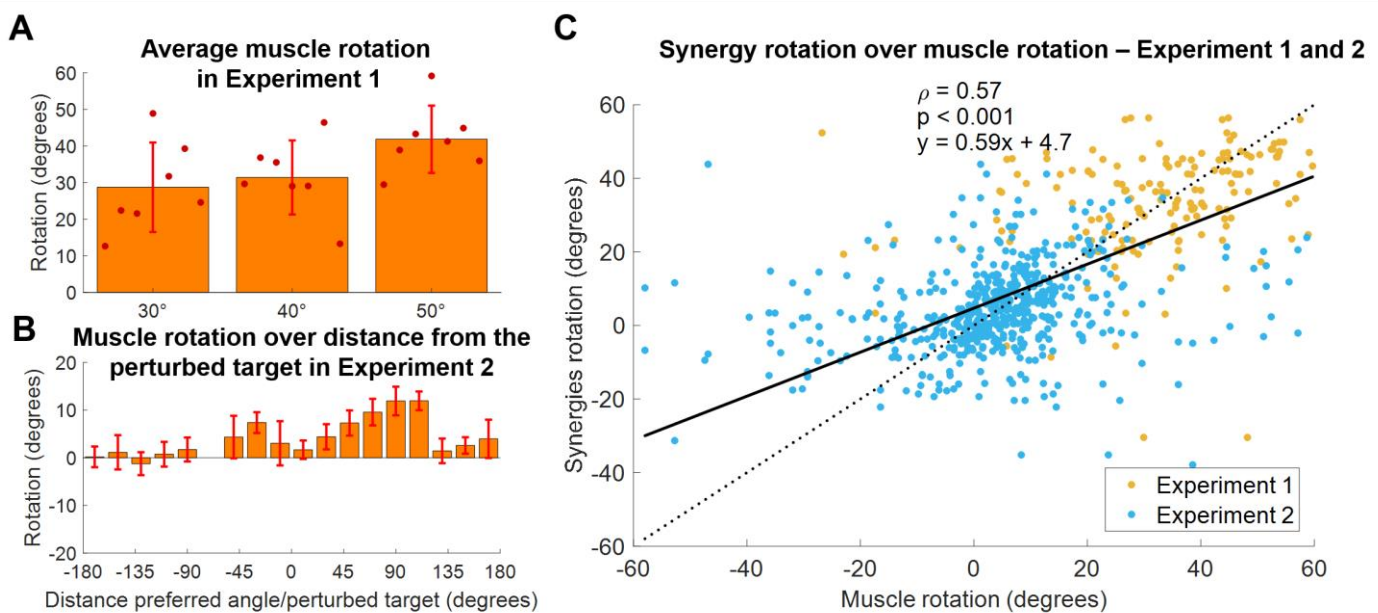

**Figure 9. Comparison between synergies and muscle rotations.** (A) Average (across muscles) rotation of the muscles at AD3 for all three macro-blocks of Experiment 1. Individual dots represent the average value for each subject in each experiment. Bars and whiskers represent the average and standard deviations across subjects. (B) Distribution of average (across subjects, targets and muscles) muscles rotations values as a function of the distance between the preferred angles of the muscles and the perturbed targets for Experiment 2. Bars represent average values, whiskers standard deviations. (C) Synergies rotations over the rotations of the muscles contributing to each synergy (data of both experiments pooled together). A muscle was considered to contribute to a synergy if its weight in the synergy was above  $> 0.4$ . The solid black line represents the linear fit between synergies and muscles rotations (values of the fit are presented in the plot, together with the  $\rho$  coefficient). The dotted line represents the fit relative to a perfect correspondence between muscles and synergies rotations.

498 the different “final” adapted states that we observed after adapting for the rotation applied on the second  
499 sub-space.

500 This interpretation of our previous results implies that the functional relationship that we identified  
501 between the preferred angles of the synergies and the workspace spanned by a visuomotor rotation  
502 could help to better understand some phenomena observed during visuomotor adaptations such as  
503 interference and transfer between adaptation processes. The first term refers to interference of prior  
504 adaptation to a subsequent adaptation process (Krakauer et al., 2005), while the second one refers to the  
505 generalization of a previously adapted behavior to a non-experienced scenario (Shadmehr, 2004). These  
506 two processes can be seen, at least functionally, as different aspects of the generalization of motor  
507 adaptations (Krakauer et al., 2006).

508 Visuomotor adaptation is a process involving the CNS at different levels starting from motor planning  
509 (Wong et al., 2015; Krakauer et al., 2019), and similarly, the processes driving generalization can also  
510 be traced at the motor planning level (Krakauer et al., 2006; Lerner et al., 2019), as exemplified also by  
511 studies that investigated the presence and extent of inter-limb generalization (Sainburg and Wang, 2002;  
512 Criscimagna-Hemminger et al., 2003; Wang and Sainburg, 2003). Nevertheless, several studies found  
513 that interference is task- and workspace-dependent (Bock et al., 2001; Woolley et al., 2007) and that  
514 generalization is constrained spatially to small sub-spaces of about 60°-90° degrees around the  
515 perturbed sub-space (Krakauer et al., 2000; Donchin et al., 2003; Brayanov et al., 2012). Thus, it  
516 appears that some aspects of the adaptation and generalization processes are dictated by biomechanical  
517 aspects, such as the workspace that the different actuators or actuating modules span in the movement  
518 space (de Rugy et al., 2009), up to the point where adaptations are only possible if they are compatible  
519 with the muscular activation space (Berger et al., 2013).

520 As an example, Wooley et al. (Woolley et al., 2007) showed that dual adaptation to opposing  
521 visuomotor rotations happens only when the workspaces associated with the two perturbations are  
522 different. When the opposing rotations are applied to the same workspace, the two adaptation processes  
523 interfere with each other. On the other hand, they showed dual adaptations to opposed rotations  
524 happening for targets that are 180 degrees apart. Interpreting their results in light of the ones that we

525 show here suggests that the dual adaptation on disjointed workspaces can happen because different,  
526 non-overlapping synergies are involved in the process, while the dual adaptation on the same workspace  
527 is not attainable because it would require opposite rotations and counter-rotations of the same set of  
528 muscular modules.

529 An adaptation process constrained by neuromuscular coordination could perhaps also help explain the  
530 reference frame that is employed during visuomotor adaptation. It was generally assumed that  
531 visuomotor adaptation is performed in an extrinsic (world-based) reference frame (Krakauer et al.,  
532 2000), as also confirmed by studies on inter-limb generalization (Wang and Sainburg, 2004).  
533 Nevertheless, more recent studies suggested a mixed effect of adaptation in extrinsic and intrinsic (joint-  
534 based) coordinates (Brayanov et al., 2012; Carroll et al., 2014) and showed that adaptation to isometric  
535 tasks presents greater transfer in intrinsic coordinates (Rotella et al., 2015). The possibility that  
536 adaptation is biomechanically constrained by the muscle synergies (de Rugy et al., 2009) may explain  
537 this uncertainty of reference frame. In the muscle synergies space, intended in this case as the muscular  
538 coactivation maps that are semi-fixed in intrinsic coordinates (with variable individual muscular gains  
539 in each synergy that depend on task requirements (Zych et al., 2019)), an extrinsic adaptation at the  
540 motor planning level could generalize to an intrinsic reference frame by a magnitude proportional to  
541 the resultant of the synergies “tuning” (Gentner et al., 2013) in the intrinsic space (and vice-versa). This  
542 hypothesis, nevertheless, cannot be tested from our current dataset and requires a specifically designed  
543 experiment to confirm it.

544 Our results once again show the solidity of the synergy model in describing upper limb motor control  
545 and motor adaptations. This is relevant given the simplified biomechanical interpretational approach  
546 that the dimensionally smaller synergistic model allows with respect to the more redundant muscular  
547 space. Previous studies have shown that adaptation is obtained by tuning single muscles (Thoroughman  
548 and Shadmehr, 1999) and that this behavior is reflected (Gentner et al., 2013; De Marchis et al., 2018)  
549 in a spatially-fixed synergy model. It is not the aim of this paper to investigate whether the synergistic  
550 model, and in particular the static spatially fixed synergy model (as compared with other, more complex  
551 models (Delis et al., 2014)) well represents the neurophysiological structures that demultiplexes the

552 cortical motor signals in the spinal cord. Our aim is rather that of understanding whether this relatively  
553 simple model can be used to describe visuomotor adaptations in a functional way, with potential  
554 applications aiming at the purposeful use of adaptations for obtaining desired kinematics and  
555 neuromuscular outputs, such as in the Error Augmentation scenario (Sharp et al., 2011; Abdollahi et  
556 al., 2014). However, such applications should consider also how the functional relationship herein  
557 identified at the neuromuscular level contribute to implicit and explicit processes of adaptation and  
558 learning (Taylor et al., 2014), given their differential effect on long term retention of adapted behaviors  
559 (Bond and Taylor, 2015).

560 As a final remark, our observation that adaptation is bounded by the synergistic space and that muscles  
561 and synergies are rotated only if engaged at their boundaries suggests a “greedy” adaptation process  
562 aiming at maximizing local efficiency (Emken et al., 2007; Ganesh et al., 2010), by which the  
563 association between muscular effort and workspace is modified only when necessary to the adaptation  
564 process, and left constant otherwise.

#### 565 **Data Availability**

566 The datasets generated for this study can be available on request to the corresponding author.

#### 567 **Ethics Statement**

568 The activities involving human participants were reviewed and approved by Ethic Committee,  
569 University College Dublin. The participants provided their written informed consent to participate in  
570 this study.

#### 571 **Author Contributions**

572 GS conceived the study, designed the experiments, analyzed the data and interpreted the results. GS  
573 and MZ performed the experiments and drafted the manuscript.

#### 574 **Funding**

575 This study was partially funded by the UCD Seed Fund #SF1303.

576

577



578 **References**

- 579 Abdollahi, F., Case Lazzaro, E.D., Listenberger, M., Kenyon, R.V., Kovic, M., Bogey, R.A., et al.  
580 (2014). Error augmentation enhancing arm recovery in individuals with chronic stroke: a  
581 randomized crossover design. *Neurorehabil Neural Repair* 28(2), 120-128. doi:  
582 10.1177/1545968313498649.
- 583 Berger, D.J., Gentner, R., Edmunds, T., Pai, D.K., and d'Avella, A. (2013). Differences in adaptation  
584 rates after virtual surgeries provide direct evidence for modularity. *J Neurosci* 33(30), 12384-  
585 12394. doi: 10.1523/JNEUROSCI.0122-13.2013.
- 586 Block, H., and Celnik, P. (2013). Stimulating the cerebellum affects visuomotor adaptation but not  
587 intermanual transfer of learning. *Cerebellum* 12(6), 781-793. doi: 10.1007/s12311-013-0486-  
588 7.
- 589 Bock, O., Schneider, S., and Bloomberg, J. (2001). Conditions for interference versus facilitation during  
590 sequential sensorimotor adaptation. *Exp Brain Res* 138(3), 359-365. doi:  
591 10.1007/s002210100704.
- 592 Bond, K.M., and Taylor, J.A. (2015). Flexible explicit but rigid implicit learning in a visuomotor  
593 adaptation task. *J Neurophysiol* 113(10), 3836-3849. doi: 10.1152/jn.00009.2015.
- 594 Brayanov, J.B., Press, D.Z., and Smith, M.A. (2012). Motor memory is encoded as a gain-field  
595 combination of intrinsic and extrinsic action representations. *J Neurosci* 32(43), 14951-14965.  
596 doi: 10.1523/JNEUROSCI.1928-12.2012.
- 597 Carroll, T.J., Poh, E., and de Rugy, A. (2014). New visuomotor maps are immediately available to the  
598 opposite limb. *J Neurophysiol* 111(11), 2232-2243. doi: 10.1152/jn.00042.2014.
- 599 Criscimagna-Hemminger, S.E., Donchin, O., Gazzaniga, M.S., and Shadmehr, R. (2003). Learned  
600 dynamics of reaching movements generalize from dominant to nondominant arm. *J*  
601 *Neurophysiol* 89(1), 168-176. doi: 10.1152/jn.00622.2002.
- 602 d'Avella, A., Portone, A., Fernandez, L., and Lacquaniti, F. (2006). Control of fast-reaching movements  
603 by muscle synergy combinations. *J Neurosci* 26(30), 7791-7810. doi:  
604 10.1523/JNEUROSCI.0830-06.2006.
- 605 d'Avella, A., Saltiel, P., and Bizzi, E. (2003). Combinations of muscle synergies in the construction of  
606 a natural motor behavior. *Nat Neurosci* 6(3), 300-308. doi: 10.1038/nn1010.
- 607 De Marchis, C., Di Somma, J., Zych, M., Conforto, S., and Severini, G. (2018). Consistent visuomotor  
608 adaptations and generalizations can be achieved through different rotations of robust motor  
609 modules. *Sci Rep* 8(1), 12657. doi: 10.1038/s41598-018-31174-2.
- 610 De Marchis, C., Severini, G., Castronovo, A.M., Schmid, M., and Conforto, S. (2015). Intermuscular  
611 coherence contributions in synergistic muscles during pedaling. *Exp Brain Res* 233(6), 1907-  
612 1919. doi: 10.1007/s00221-015-4262-4.
- 613 de Rugy, A., Hinder, M.R., Woolley, D.G., and Carson, R.G. (2009). The synergistic organization of  
614 muscle recruitment constrains visuomotor adaptation. *J Neurophysiol* 101(5), 2263-2269. doi:  
615 10.1152/jn.90898.2008.
- 616 Delis, I., Panzeri, S., Pozzo, T., and Berret, B. (2014). A unifying model of concurrent spatial and  
617 temporal modularity in muscle activity. *J Neurophysiol* 111(3), 675-693. doi:  
618 10.1152/jn.00245.2013.
- 619 Della-Maggiore, V., Scholz, J., Johansen-Berg, H., and Paus, T. (2009). The rate of visuomotor  
620 adaptation correlates with cerebellar white-matter microstructure. *Hum Brain Mapp* 30(12),  
621 4048-4053. doi: 10.1002/hbm.20828.
- 622 Donchin, O., Francis, J.T., and Shadmehr, R. (2003). Quantifying generalization from trial-by-trial  
623 behavior of adaptive systems that learn with basis functions: theory and experiments in human  
624 motor control. *J Neurosci* 23(27), 9032-9045.
- 625 Emken, J.L., Benitez, R., Sideris, A., Bobrow, J.E., and Reinkensmeyer, D.J. (2007). Motor adaptation  
626 as a greedy optimization of error and effort. *J Neurophysiol* 97(6), 3997-4006. doi:  
627 10.1152/jn.01095.2006.
- 628 Ganesh, G., Haruno, M., Kawato, M., and Burdet, E. (2010). Motor memory and local minimization of  
629 error and effort, not global optimization, determine motor behavior. *J Neurophysiol* 104(1),  
630 382-390. doi: 10.1152/jn.01058.2009.



- 631 Gentner, R., Edmunds, T., Pai, D.K., and d'Avella, A. (2013). Robustness of muscle synergies during  
632 visuomotor adaptation. *Front Comput Neurosci* 7, 120. doi: 10.3389/fncom.2013.00120.
- 633 Hinder, M.R., Walk, L., Woolley, D.G., Riek, S., and Carson, R.G. (2007). The interference effects of  
634 non-rotated versus counter-rotated trials in visuomotor adaptation. *Exp Brain Res* 180(4), 629-  
635 640. doi: 10.1007/s00221-007-0888-1.
- 636 Krakauer, J.W., Ghez, C., and Ghilardi, M.F. (2005). Adaptation to visuomotor transformations:  
637 consolidation, interference, and forgetting. *J Neurosci* 25(2), 473-478. doi:  
638 10.1523/JNEUROSCI.4218-04.2005.
- 639 Krakauer, J.W., Ghilardi, M.F., and Ghez, C. (1999). Independent learning of internal models for  
640 kinematic and dynamic control of reaching. *Nat Neurosci* 2(11), 1026-1031. doi:  
641 10.1038/14826.
- 642 Krakauer, J.W., Hadjiosif, A.M., Xu, J., Wong, A.L., and Haith, A.M. (2019). Motor Learning. *Compr*  
643 *Physiol* 9(2), 613-663. doi: 10.1002/cphy.c170043.
- 644 Krakauer, J.W., Mazzoni, P., Ghazizadeh, A., Ravindran, R., and Shadmehr, R. (2006). Generalization  
645 of motor learning depends on the history of prior action. *PLoS Biol* 4(10), e316. doi:  
646 10.1371/journal.pbio.0040316.
- 647 Krakauer, J.W., Pine, Z.M., Ghilardi, M.F., and Ghez, C. (2000). Learning of visuomotor  
648 transformations for vectorial planning of reaching trajectories. *J Neurosci* 20(23), 8916-8924.
- 649 Lee, D.D., and Seung, H.S. (Year). "Algorithms for non-negative matrix factorization", in: *Advances in*  
650 *neural information processing systems*, 556-562.
- 651 Lerner, G., Albert, S., Caffaro, P.A., Villalta, J.I., Jacobacci, F., Shadmehr, R., et al. (2019). The origins  
652 of anterograde interference in visuomotor adaptation. *bioRxiv*, 593996.
- 653 Mandelblat-Cerf, Y., Paz, R., and Vaadia, E. (2009). Trial-to-trial variability of single cells in motor  
654 cortices is dynamically modified during visuomotor adaptation. *J Neurosci* 29(48), 15053-  
655 15062. doi: 10.1523/JNEUROSCI.3011-09.2009.
- 656 Perich, M.G., Gallego, J.A., and Miller, L.E. (2018). A Neural Population Mechanism for Rapid  
657 Learning. *Neuron* 100(4), 964-976 e967. doi: 10.1016/j.neuron.2018.09.030.
- 658 Rotella, M.F., Nisky, I., Koehler, M., Rinderknecht, M.D., Bastian, A.J., and Okamura, A.M. (2015).  
659 Learning and generalization in an isometric visuomotor task. *Journal of Neurophysiology*  
660 113(6), 1873-1884. doi: 10.1152/jn.00255.2014.
- 661 Sainburg, R.L., and Wang, J. (2002). Interlimb transfer of visuomotor rotations: independence of  
662 direction and final position information. *Exp Brain Res* 145(4), 437-447. doi: 10.1007/s00221-  
663 002-1140-7.
- 664 Schlerf, J.E., Galea, J.M., Bastian, A.J., and Celnik, P.A. (2012). Dynamic modulation of cerebellar  
665 excitability for abrupt, but not gradual, visuomotor adaptation. *J Neurosci* 32(34), 11610-  
666 11617. doi: 10.1523/JNEUROSCI.1609-12.2012.
- 667 Shadmehr, R. (2004). Generalization as a behavioral window to the neural mechanisms of learning  
668 internal models. *Hum Mov Sci* 23(5), 543-568. doi: 10.1016/j.humov.2004.04.003.
- 669 Sharp, I., Huang, F., and Patton, J. (2011). Visual error augmentation enhances learning in three  
670 dimensions. *J Neuroeng Rehabil* 8, 52. doi: 10.1186/1743-0003-8-52.
- 671 Taylor, J.A., Krakauer, J.W., and Ivry, R.B. (2014). Explicit and implicit contributions to learning in a  
672 sensorimotor adaptation task. *J Neurosci* 34(8), 3023-3032. doi: 10.1523/JNEUROSCI.3619-  
673 13.2014.
- 674 Thoroughman, K.A., and Shadmehr, R. (1999). Electromyographic correlates of learning an internal  
675 model of reaching movements. *J Neurosci* 19(19), 8573-8588.
- 676 Wang, J., and Sainburg, R.L. (2003). Mechanisms underlying interlimb transfer of visuomotor rotations.  
677 *Exp Brain Res* 149(4), 520-526. doi: 10.1007/s00221-003-1392-x.
- 678 Wang, J., and Sainburg, R.L. (2004). Limitations in interlimb transfer of visuomotor rotations. *Exp*  
679 *Brain Res* 155(1), 1-8. doi: 10.1007/s00221-003-1691-2.
- 680 Wigmore, V., Tong, C., and Flanagan, J.R. (2002). Visuomotor rotations of varying size and direction  
681 compete for a single internal model in motor working memory. *J Exp Psychol Hum Percept*  
682 *Perform* 28(2), 447-457. doi: 10.1037//0096-1523.28.2.447.
- 683 Wise, S.P., Moody, S.L., Blomstrom, K.J., and Mitz, A.R. (1998). Changes in motor cortical activity  
684 during visuomotor adaptation. *Exp Brain Res* 121(3), 285-299. doi: 10.1007/s002210050462.

- 685 Wong, A.L., Haith, A.M., and Krakauer, J.W. (2015). Motor Planning. *Neuroscientist* 21(4), 385-398.  
686 doi: 10.1177/1073858414541484.
- 687 Woolley, D.G., Tresilian, J.R., Carson, R.G., and Riek, S. (2007). Dual adaptation to two opposing  
688 visuomotor rotations when each is associated with different regions of workspace. *Exp Brain*  
689 *Res* 179(2), 155-165. doi: 10.1007/s00221-006-0778-y.
- 690 Zych, M., Rankin, I., Holland, D., and Severini, G. (2019). Temporal and spatial asymmetries during  
691 stationary cycling cause different feedforward and feedback modifications in the muscular  
692 control of the lower limbs. *J Neurophysiol* 121(1), 163-176. doi: 10.1152/jn.00482.2018.
- 693
